# Supplementary material
Source: MDPI journal article supplement (https://www.mdpi.com/2077-0472/11/6/488)
Supplement: s1 [file s1]

## Supplementary Material

# Screening of Functional Compounds in Supercritical Carbon Dioxide Extracts from Perennial Herbaceous Crops

Mateusz Ostolski, Marek Adamczak, Bartosz Brzozowski, Mariusz Jerzy Stolarski

**Table S1.** The results of ANOVA ( $p < 0.05$ ) for the influence of substrate, extraction conditions and harvest time (A) June, (B) October, (C) February on total polyphenol concentration (TPC).

| Effect                                        | Sum of square | Degrees of freedom | Mean square | F-value  | p-value |
|-----------------------------------------------|---------------|--------------------|-------------|----------|---------|
| Substrate                                     | 18142.55      | 6                  | 3023.76     | 3744.89  | 0.000   |
| Harvest time                                  | 16383.54      | 2                  | 8191.77     | 10145.41 | 0.000   |
| Extraction conditions                         | 36308.34      | 1                  | 36308.34    | 44967.46 | 0.000   |
| Substrate*Harvest time                        | 19779.70      | 12                 | 1648.31     | 2041.41  | 0.000   |
| Substrate*Extraction conditions               | 17481.63      | 6                  | 2913.61     | 3608.47  | 0.000   |
| Harvest time*Extraction conditions            | 6663.53       | 2                  | 3331.76     | 4126.35  | 0.000   |
| Substrate* Harvest time*Extraction conditions | 15900.62      | 12                 | 1325.05     | 1641.06  | 0.000   |
| Error                                         | 67.82         | 84                 | 0.81        |          |         |

**Table S2.** The results of ANOVA ( $p < 0.05$ ) for the influence of substrate, extraction conditions and harvest time (A) June, (B) October, (C) February on total flavonoid concentration (TFC)

| Effect                                        | Sum of square | Degrees of freedom | Mean square | F-value  | p-value |
|-----------------------------------------------|---------------|--------------------|-------------|----------|---------|
| Substrate                                     | 58.02         | 6                  | 9.67        | 1903.73  | 0.000   |
| Harvest time                                  | 25.37         | 2                  | 12.69       | 2497.61  | 0.000   |
| Extraction conditions                         | 19.22         | 1                  | 19.22       | 3783.79  | 0.000   |
| Substrate*Harvest time                        | 173.59        | 12                 | 14.47       | 2848.02  | 0.000   |
| Substrate*Extraction conditions               | 44.97         | 6                  | 7.49        | 1475.45  | 0.000   |
| Harvest time*Extraction conditions            | 155.17        | 2                  | 77.59       | 15274.88 | 0.000   |
| Substrate* Harvest time*Extraction conditions | 137.58        | 12                 | 11.47       | 2257.19  | 0.000   |
| Error                                         | 0.43          | 84                 | 0.01        |          |         |

**Table S3.** The results of ANOVA ( $p < 0.05$ ) for the influence of substrate, extraction conditions and harvest time (A) June, (B) October, (C) February on antioxidant activity (DPPH assay)

| Effect                                        | Sum of square | Degrees of freedom | Mean square | F-value   | p-value |
|-----------------------------------------------|---------------|--------------------|-------------|-----------|---------|
| Substrate                                     | 1393393.48    | 6                  | 232232.25   | 6331.03   | 0.000   |
| Harvest time                                  | 4166187.31    | 2                  | 2083093.65  | 56788.49  | 0.000   |
| Extraction conditions                         | 6122738.64    | 1                  | 6122738.64  | 166915.73 | 0.000   |
| Substrate*Harvest time                        | 746698.35     | 12                 | 62224.86    | 1696.35   | 0.000   |
| Substrate*Extraction conditions               | 930044.08     | 6                  | 155007.35   | 4225.75   | 0.000   |
| Harvest time*Extraction conditions            | 3069623.93    | 2                  | 1534811.97  | 41841.45  | 0.000   |
| Substrate* Harvest time*Extraction conditions | 615489.43     | 12                 | 51290.79    | 1398.27   | 0.000   |
| Error                                         | 3081.26       | 84                 | 36.68       |           |         |



**Table S4.** Wavenumbers of QATR-FTIR peaks of supercritical plant extracts (scCO<sub>2</sub> and scCO<sub>2</sub>/H<sub>2</sub>O) harvested in June

| Group | Wavenumbers (cm <sup>-1</sup> ) |                                     |                     |                                     |                    |                                     |                     |                                     |                   |                                     |                   |                                     |                   |                                     |
|-------|---------------------------------|-------------------------------------|---------------------|-------------------------------------|--------------------|-------------------------------------|---------------------|-------------------------------------|-------------------|-------------------------------------|-------------------|-------------------------------------|-------------------|-------------------------------------|
|       | <i>H. salicifolius</i>          | <i>S. perfoliatum</i>               | <i>H. tuberosus</i> | <i>M. × giganteus</i>               | <i>M. sinensis</i> | <i>M. sacchariflorus</i>            | <i>S. pectinata</i> |                                     |                   |                                     |                   |                                     |                   |                                     |
|       | scCO <sub>2</sub>               | scCO <sub>2</sub> /H <sub>2</sub> O | scCO <sub>2</sub>   | scCO <sub>2</sub> /H <sub>2</sub> O | scCO <sub>2</sub>  | scCO <sub>2</sub> /H <sub>2</sub> O | scCO <sub>2</sub>   | scCO <sub>2</sub> /H <sub>2</sub> O | scCO <sub>2</sub> | scCO <sub>2</sub> /H <sub>2</sub> O | scCO <sub>2</sub> | scCO <sub>2</sub> /H <sub>2</sub> O | scCO <sub>2</sub> | scCO <sub>2</sub> /H <sub>2</sub> O |
| 1     | 3385                            | 3358                                | -                   | 3338                                | 3421               | 3404                                | 3335                | -                                   | 3360              | 3373                                | -                 | -                                   | -                 | 3336                                |
| 2     | 3070                            | 2967                                | 2955                | 2926                                | 2919               | 2969                                | 2916                | 2916                                | 2916              | 2918                                | 3010              | 3010                                | 2916              | 2933                                |
|       | 2918                            | 2925                                | 2915                | 2872                                | 2850               | 2929                                | 2849                | 1849                                | 2849              | 2849                                | 2916              | 2918                                | 2849              |                                     |
|       | 2850                            | 2876                                | 2849                |                                     |                    |                                     |                     |                                     |                   |                                     | 2849              | 2849                                |                   |                                     |
| 3     | 1689                            | 1709                                | 1708                | 1706                                | 1745               | 1748                                | 1709                | 1706                                | 1709              | 1708                                | 1709              | 1708                                | 1709              | 1688                                |
|       |                                 |                                     |                     |                                     | 1706               | 1708                                |                     |                                     |                   |                                     |                   |                                     |                   |                                     |
|       |                                 |                                     |                     |                                     | 1648               | 1659                                |                     |                                     |                   |                                     |                   |                                     |                   |                                     |
| 4     | -                               | 1515                                | -                   | 1602                                | -                  | 1515                                | -                   | -                                   | -                 | -                                   | -                 | -                                   | -                 | 1596                                |
|       |                                 |                                     |                     | 1515                                |                    |                                     |                     |                                     |                   |                                     |                   |                                     |                   | 1514                                |
| 5     | 1464                            | 1452                                | 1464                | 1455                                | 1455               | 1374                                | 1464                | 1464                                | 1464              | 1464                                | 1464              | 1464                                | 1464              | 1458                                |
|       | 1371                            | 1374                                | 1445                | 1427                                | 1382               |                                     | 1375                | 1372                                | 1375              | 1375                                | 1375              | 1374                                | 1377              | 1427                                |
|       | 1328                            |                                     | 1377                | 1372                                | 1313               |                                     |                     |                                     |                   |                                     |                   |                                     |                   | 1374                                |
|       |                                 |                                     | 1310                |                                     |                    |                                     |                     |                                     |                   |                                     |                   |                                     |                   |                                     |
| 6     |                                 |                                     | 1291                |                                     |                    |                                     |                     |                                     |                   |                                     |                   |                                     |                   |                                     |
|       | 1255                            | 1268                                | 1271                | 1271                                | 1243               | 1255                                | 1168                | 1170                                | 1170              | 1170                                | 1173              | 1170                                | 1247              | 1271                                |
|       | 1187                            | 1186                                | 1251                | 1213                                | 1196               | 1197                                |                     |                                     |                   |                                     |                   |                                     | 1170              | 1210                                |
|       | 1154                            |                                     | 1231                | 1119                                | 1153               | 1151                                |                     |                                     |                   |                                     |                   |                                     |                   | 1119                                |
| 7     | 1094                            | 1050                                | 1103                | 1037                                | 1079               | 1080                                | 1104                | 1103                                | 1104              | 1054                                | 1104              | 1054                                | 1104              | 1031                                |
|       | 1069                            |                                     |                     |                                     | 1044               | 1041                                | 1044                | 1054                                | 1050              | 1013                                | 1050              | 1014                                | 1034              |                                     |
|       | 1023                            |                                     |                     |                                     |                    |                                     |                     | 1013                                |                   |                                     |                   |                                     |                   |                                     |
| 8     | 919                             | 924                                 | 886                 | -                                   | 960                | 962                                 | 987                 | 723                                 | 956               | 722                                 | 956               | 723                                 | 892               | 944                                 |
|       | 873                             | 886                                 | 719                 |                                     | 930                | 886                                 | 723                 |                                     | 722               |                                     | 722               |                                     | 836               | 856                                 |
|       | 792                             | 835                                 | 679                 |                                     | 883                | 842                                 |                     |                                     |                   |                                     |                   |                                     | 723               | 820                                 |
|       | 765                             | 642                                 | 636                 |                                     | 840                | 819                                 |                     |                                     |                   |                                     |                   |                                     |                   | 768                                 |
|       | 725                             |                                     |                     |                                     | 822                | 760                                 |                     |                                     |                   |                                     |                   |                                     |                   | 628                                 |
|       | 698                             |                                     |                     |                                     | 793                | 722                                 |                     |                                     |                   |                                     |                   |                                     |                   | 572                                 |
|       | 631                             |                                     |                     |                                     | 760                | 626                                 |                     |                                     |                   |                                     |                   |                                     |                   |                                     |
|       | 581                             |                                     |                     |                                     | 722                | 585                                 |                     |                                     |                   |                                     |                   |                                     |                   |                                     |
|       | 525                             |                                     |                     |                                     | 678                | 548                                 |                     |                                     |                   |                                     |                   |                                     |                   |                                     |
|       |                                 |                                     |                     |                                     | 626                | 512                                 |                     |                                     |                   |                                     |                   |                                     |                   |                                     |
|       |                                 |                                     |                     |                                     | 586                |                                     |                     |                                     |                   |                                     |                   |                                     |                   |                                     |
|       |                                 |                                     |                     |                                     | 546                |                                     |                     |                                     |                   |                                     |                   |                                     |                   |                                     |
|       |                                 |                                     |                     |                                     | 514                |                                     |                     |                                     |                   |                                     |                   |                                     |                   |                                     |
| 9     | 468                             | -                                   | -                   | -                                   | 468                | 465                                 | -                   | -                                   | -                 | -                                   | -                 | -                                   | -                 | 501                                 |
|       | 427                             |                                     |                     |                                     | 442                | 441                                 |                     |                                     |                   |                                     |                   |                                     |                   | 465                                 |

- - no signal



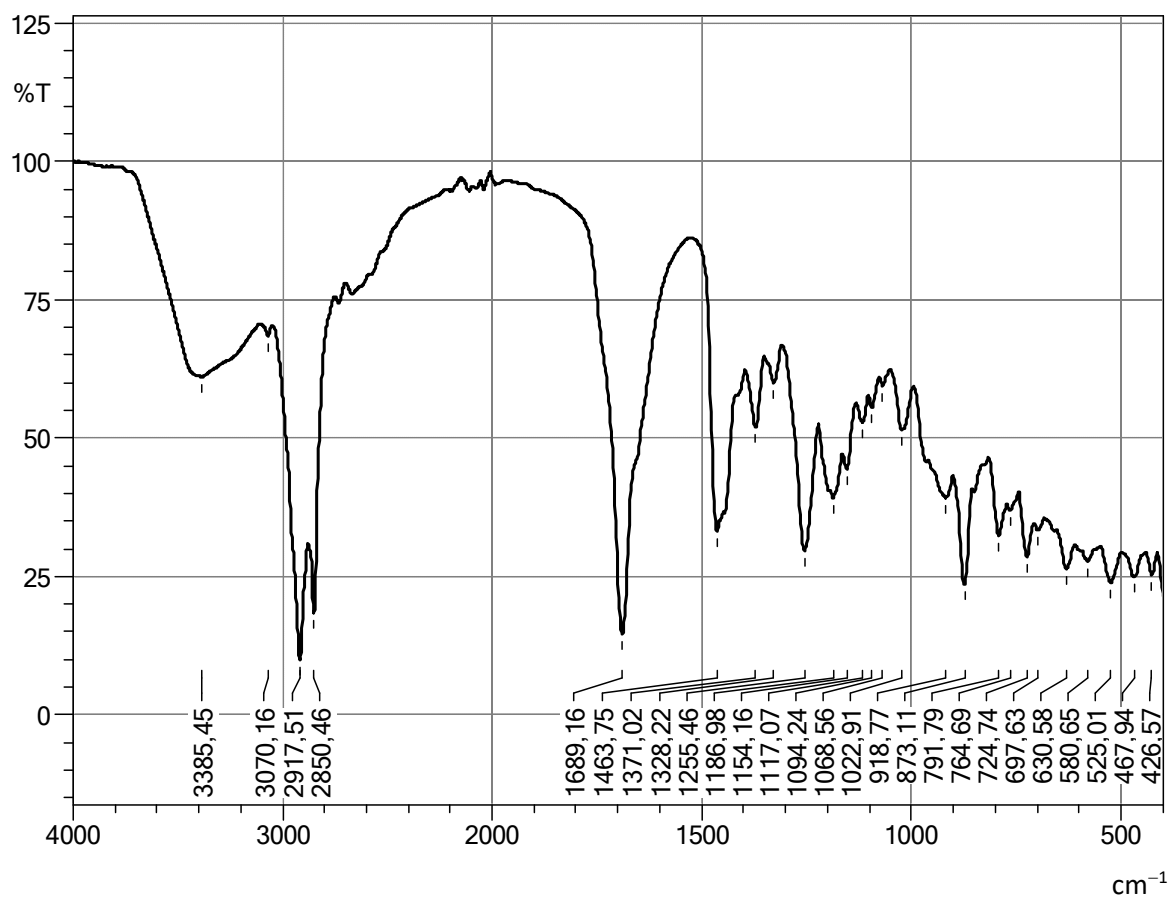

**Figure S1.** QATR-FTIR spectrum of the scCO<sub>2</sub> extract from *H. salicifolius* harvested in June.

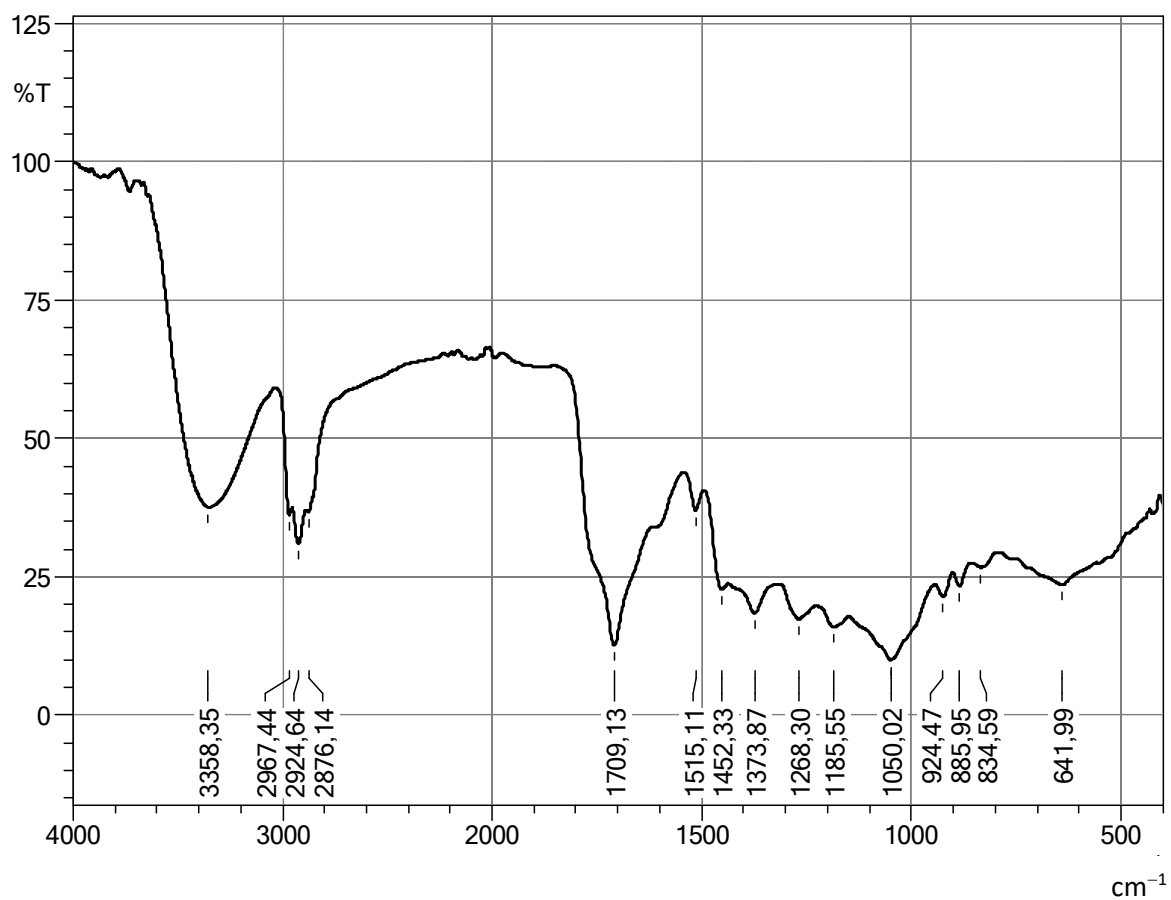

**Figure S2.** QATR-FTIR spectrum of the scCO<sub>2</sub>/H<sub>2</sub>O extract from *H. salicifolius* harvested in June.



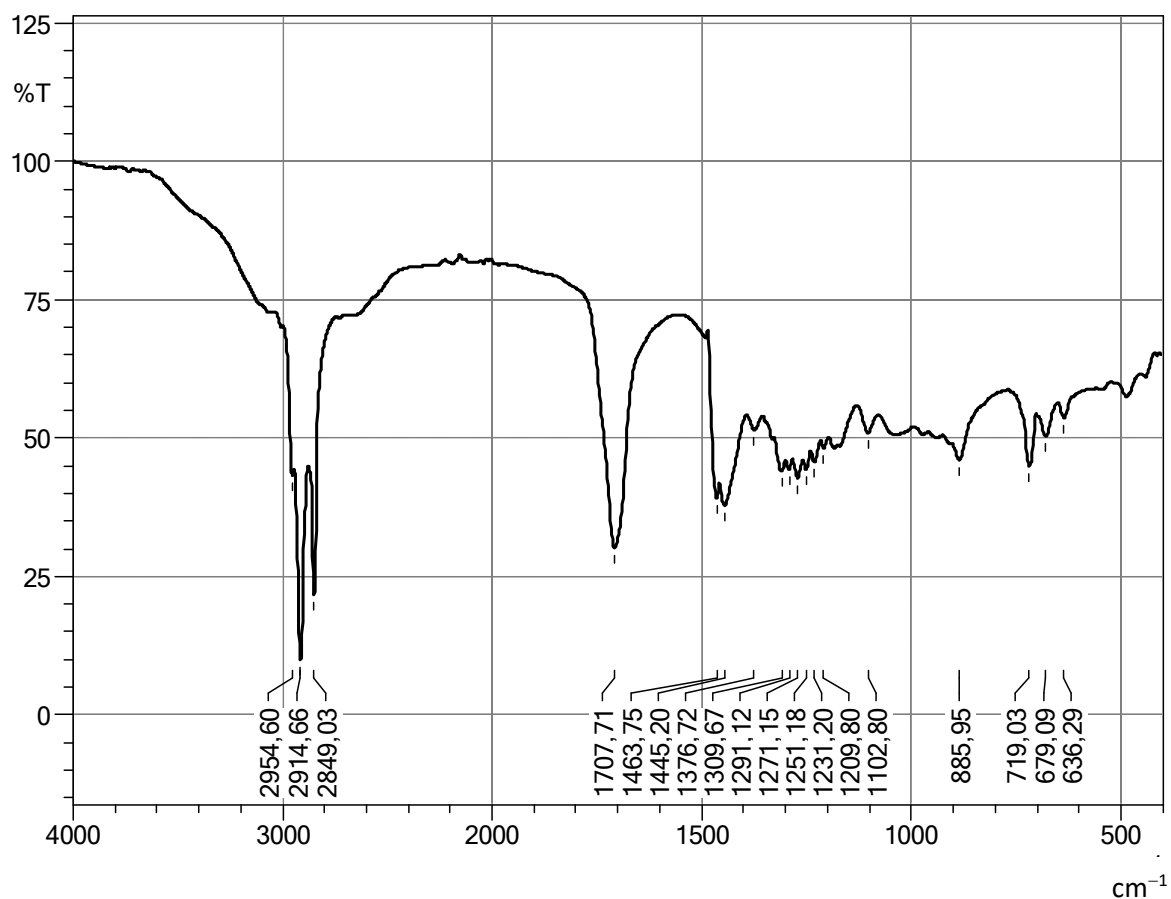

**Figure S3.** QATR-FTIR spectrum of the scCO<sub>2</sub> extract from *S. perfoliatum* harvested in June.

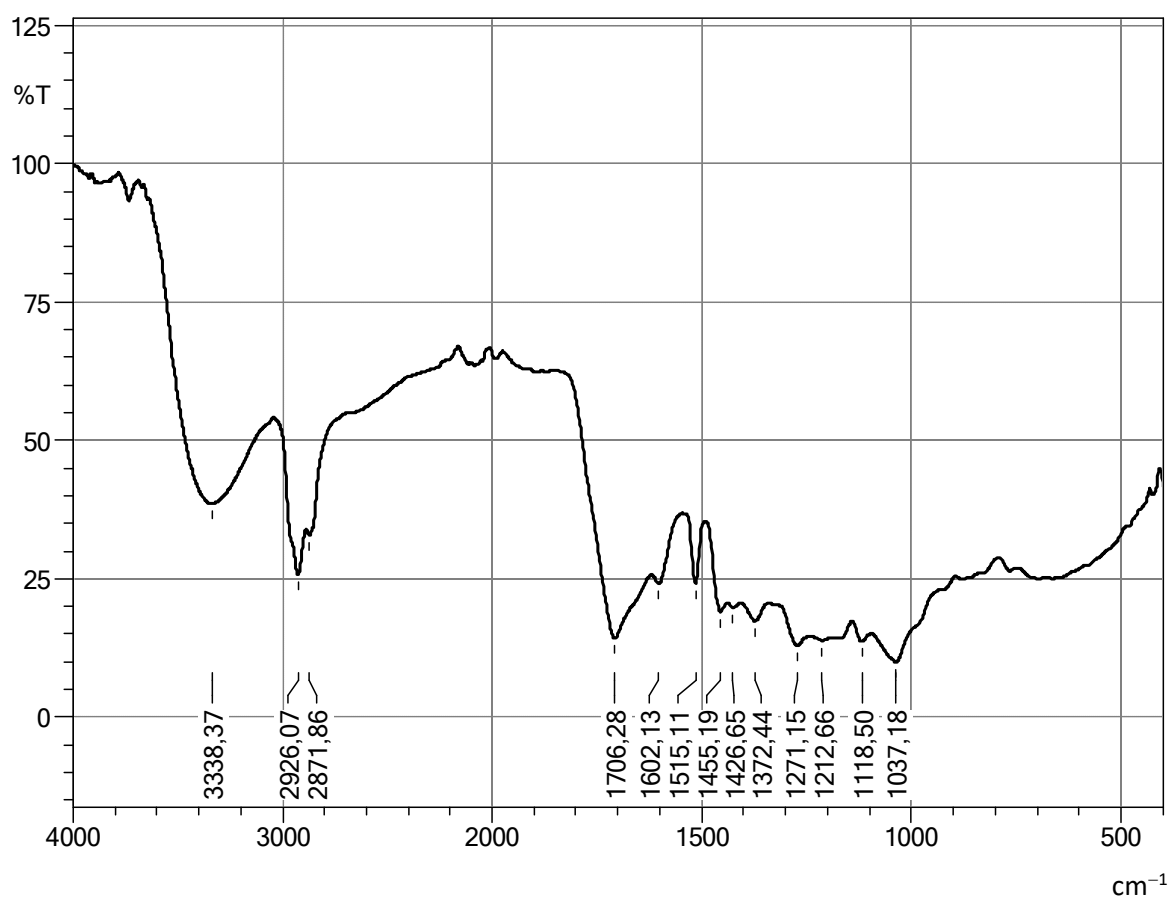

**Figure S4.** QATR-FTIR spectrum of the scCO<sub>2</sub>/H<sub>2</sub>O extract from *S. perfoliatum* harvested in June.



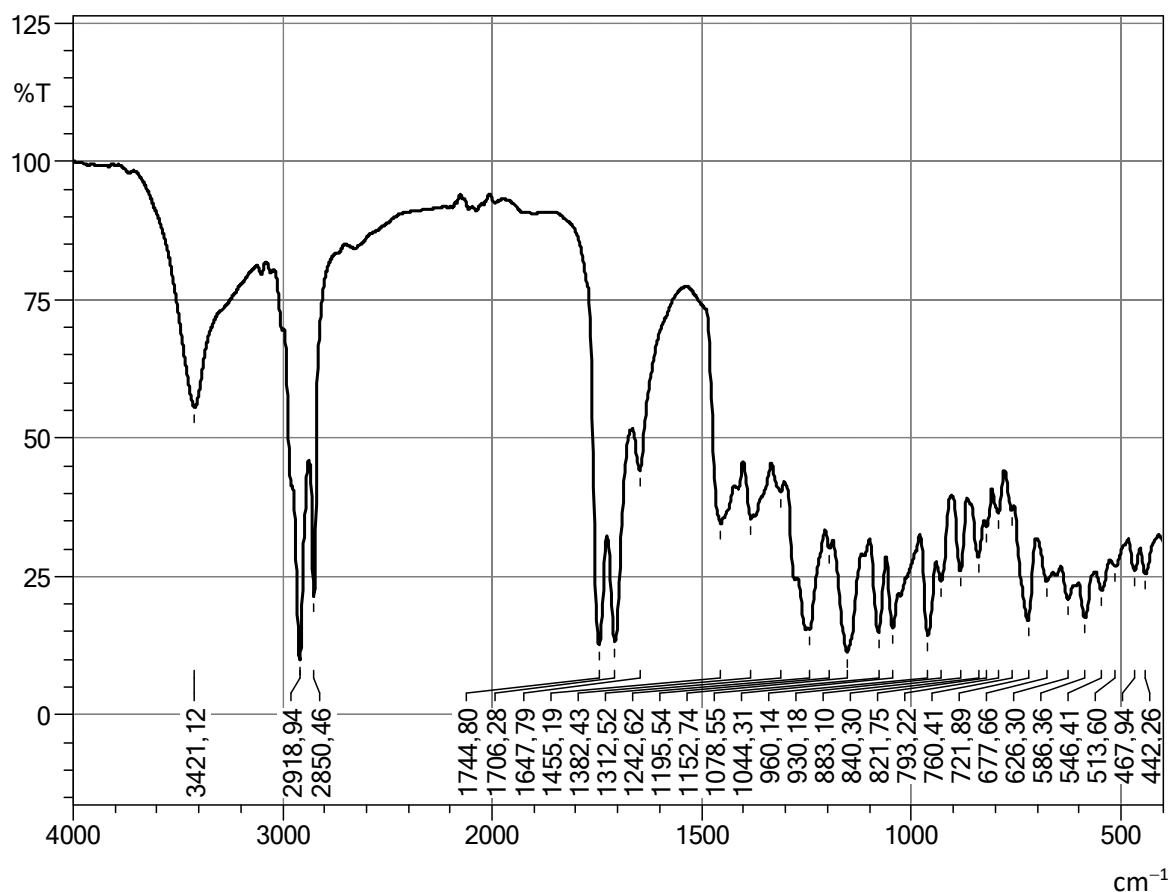

**Figure S5.** QATR-FTIR spectrum of the scCO<sub>2</sub> extract from *H. tuberosus* harvested in June.

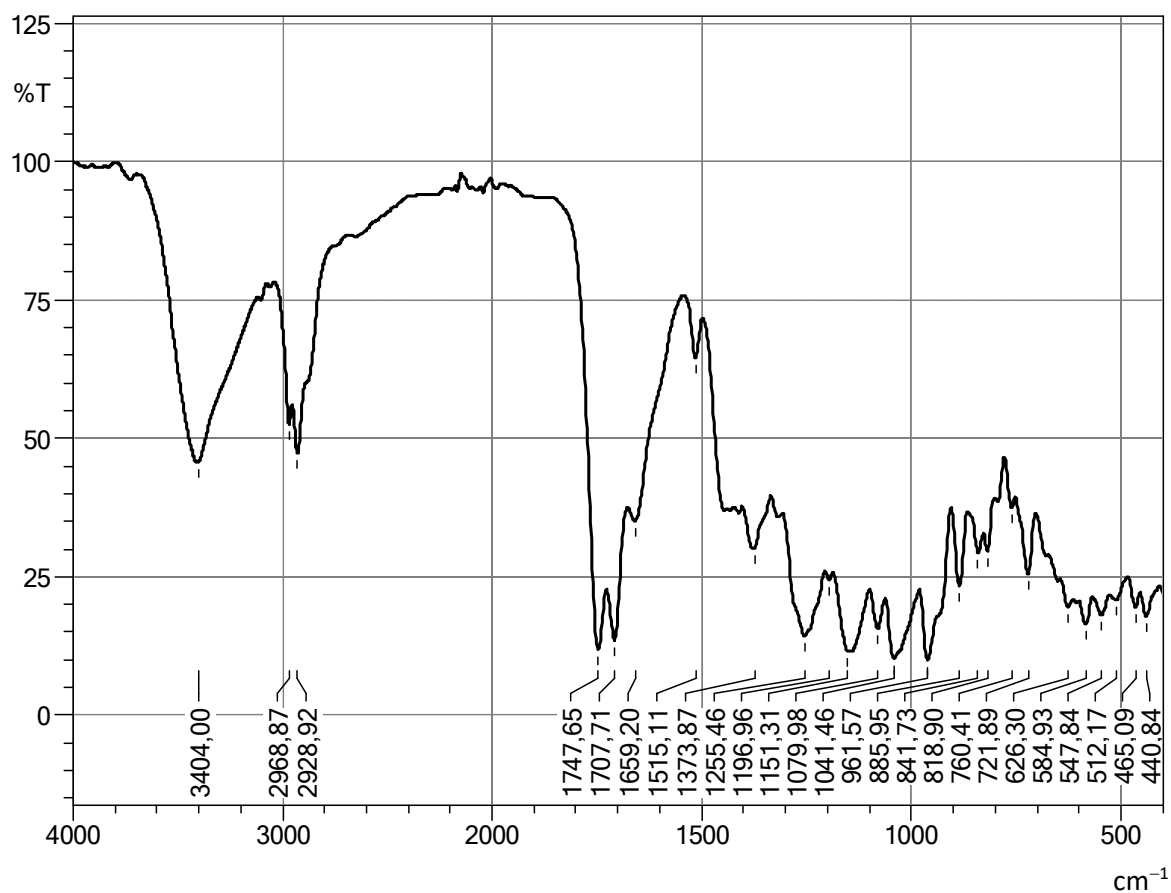

**Figure S6.** QATR-FTIR spectrum of the scCO<sub>2</sub>/H<sub>2</sub>O extract from *H. tuberosus* harvested in June.



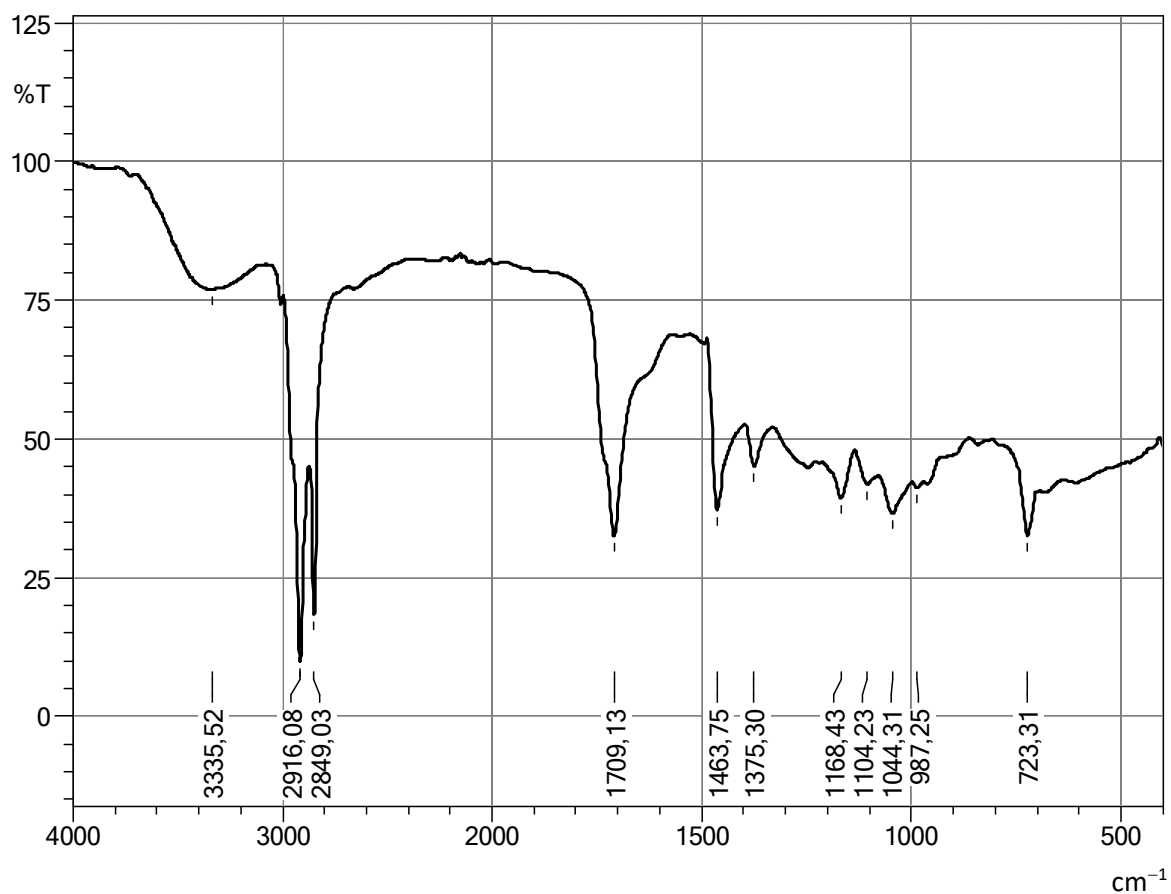

Figure S7. QATR- FTIR spectrum of the scCO<sub>2</sub> extract from *M. x giganteus* harvested in June.

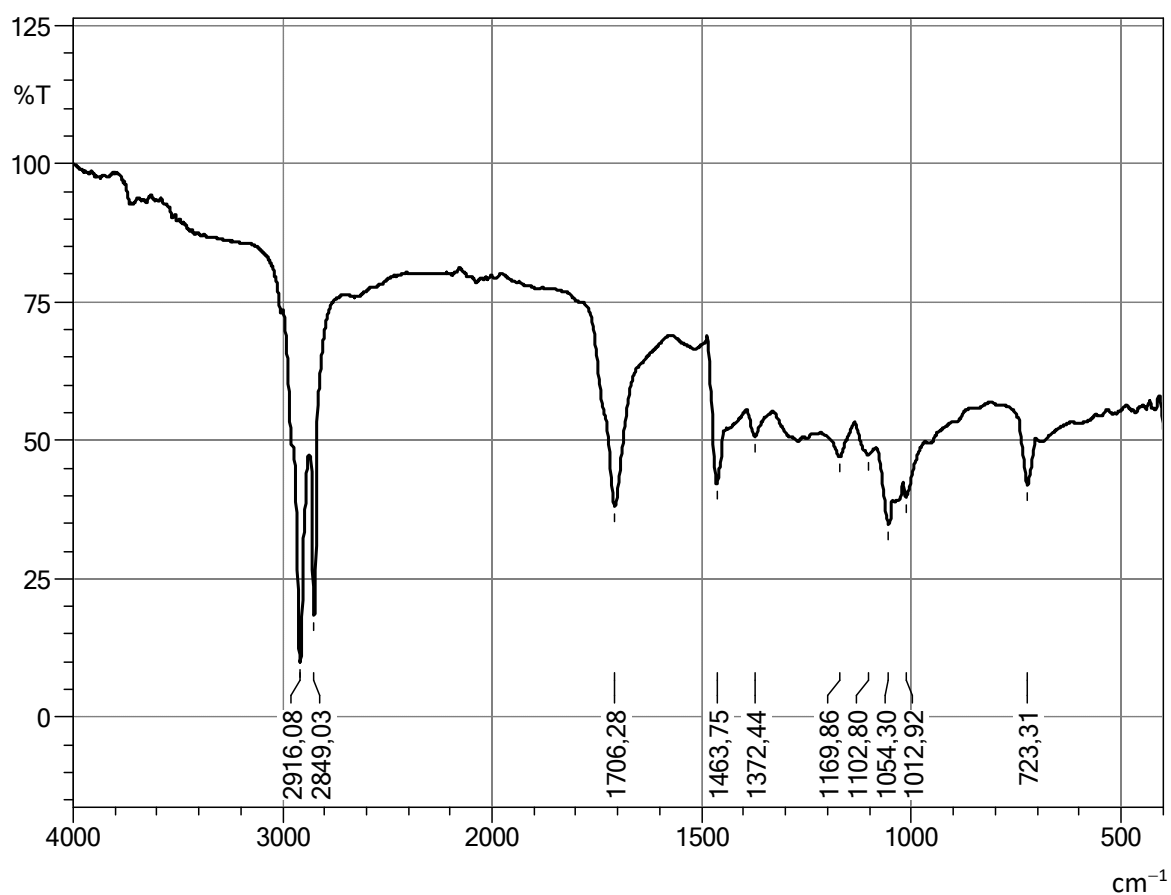

Figure S8. QATR-FTIR spectrum of the scCO<sub>2</sub>/H<sub>2</sub>O extract from *M. x giganteus* harvested in June.



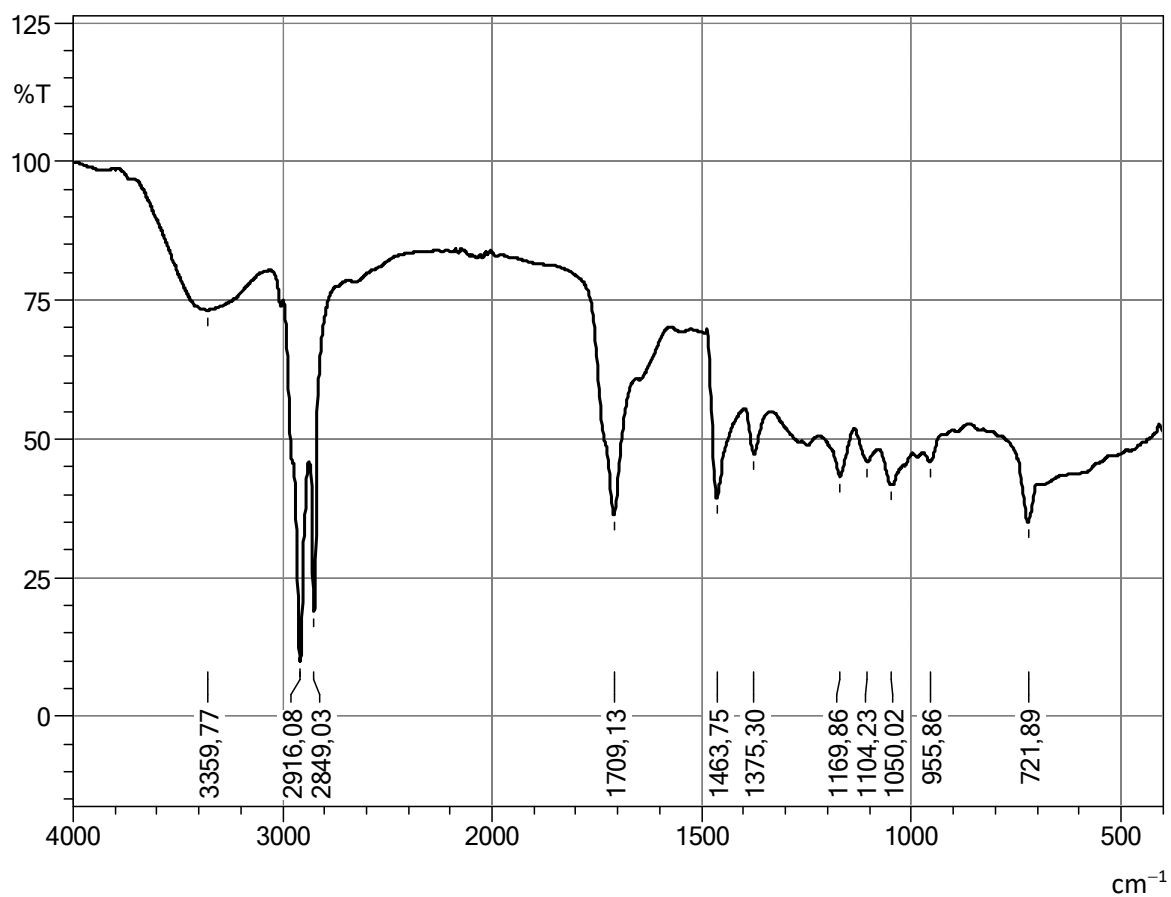

Figure S9. QATR- FTIR spectrum of the scCO<sub>2</sub> extract from *M. sinensis* harvested in June.

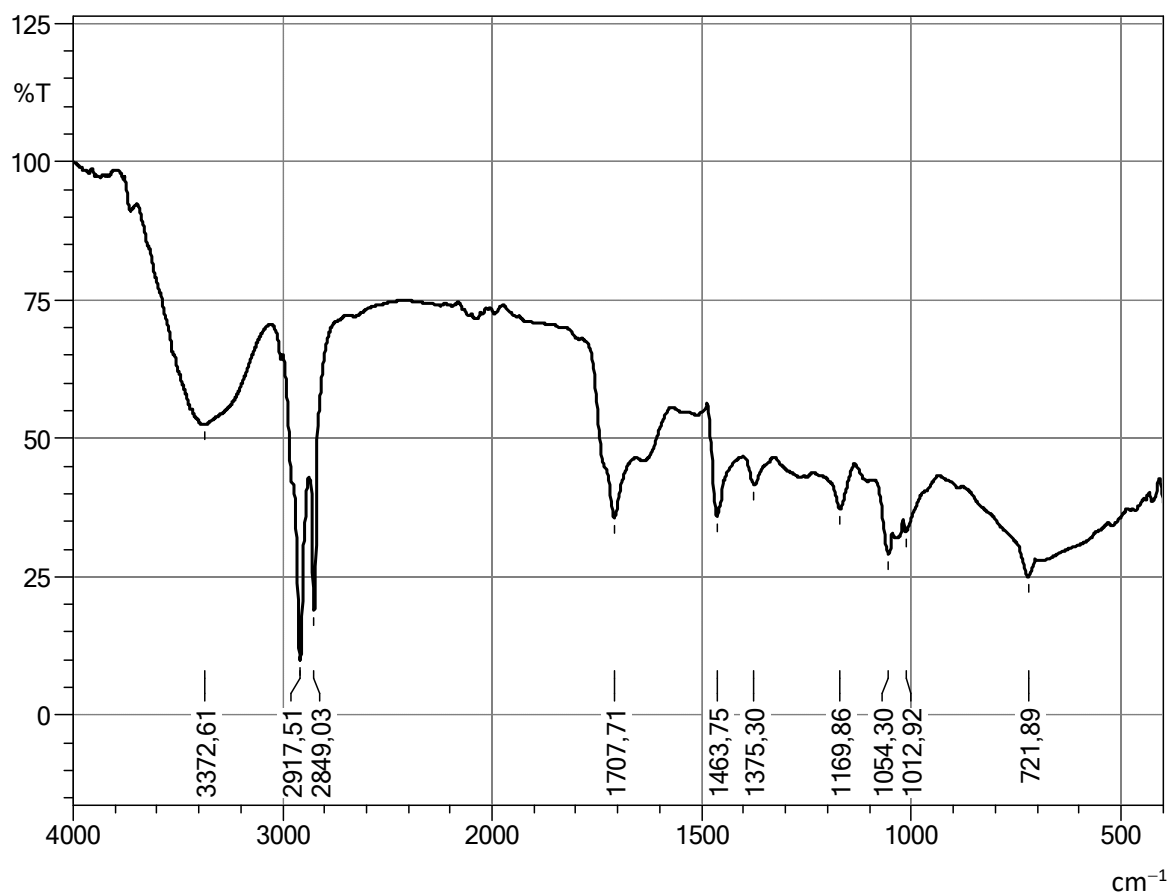

Figure S10. QATR-FTIR spectrum of the scCO<sub>2</sub>/H<sub>2</sub>O extract from *M. sinensis* harvested in June.



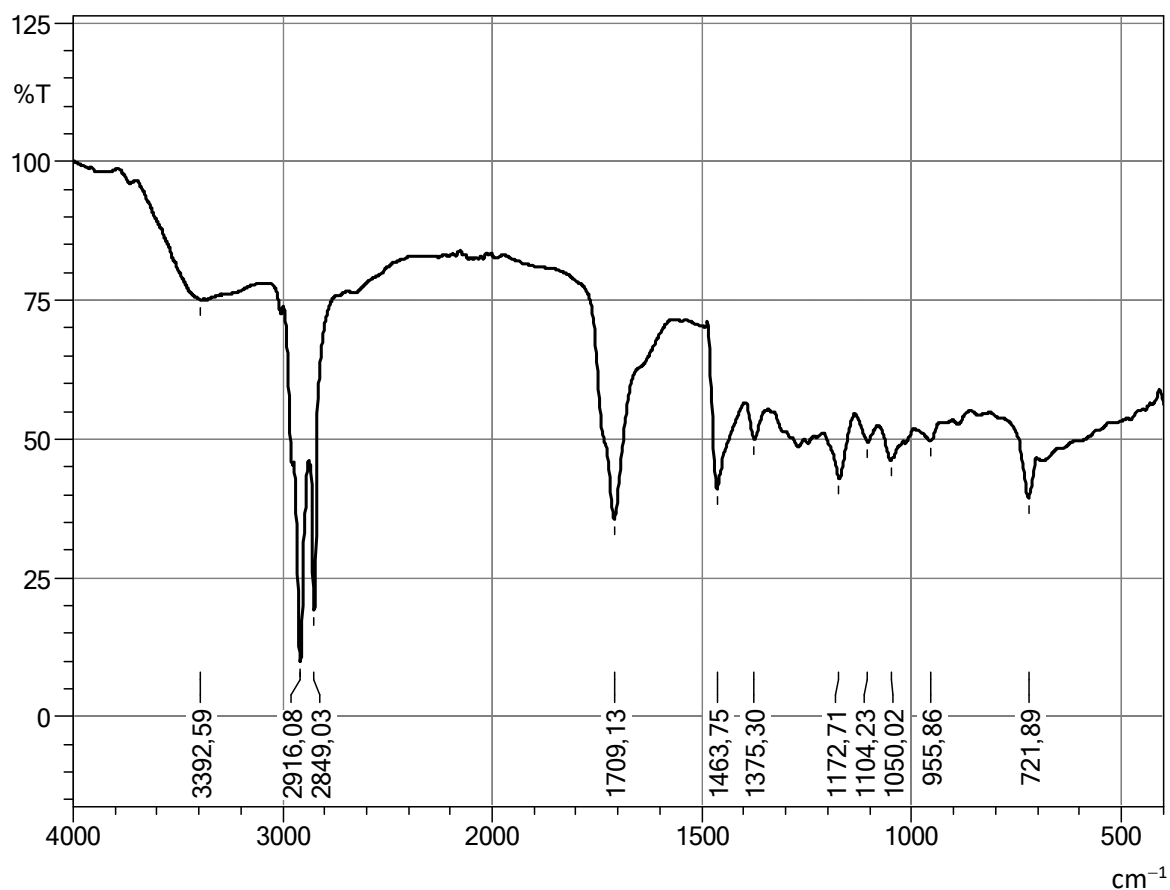

**Figure S11.** QATR- FTIR spectrum of the scCO<sub>2</sub> extract from *M. sacchariflorus* harvested in June.

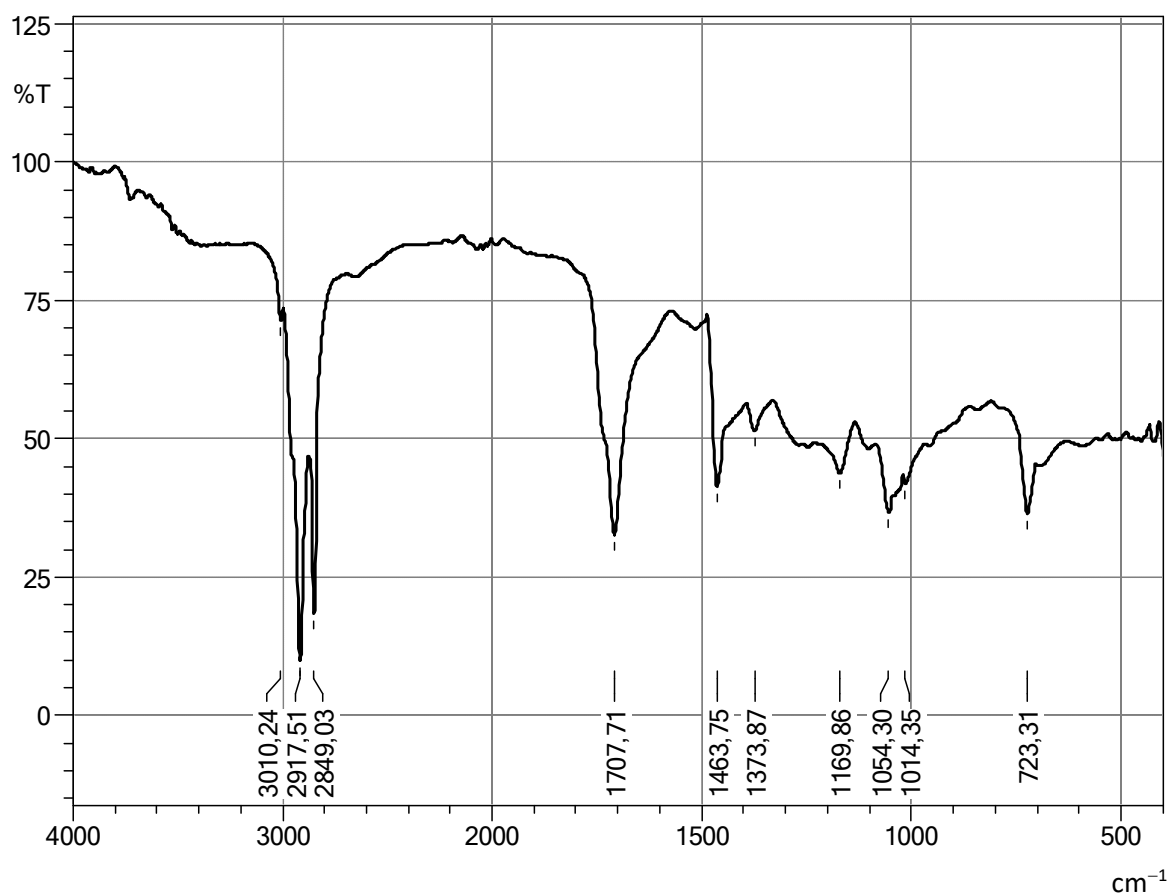

**Figure S12.** QATR-FTIR spectrum of the scCO<sub>2</sub>/H<sub>2</sub>O extract from *M. sacchariflorus* harvested in June.



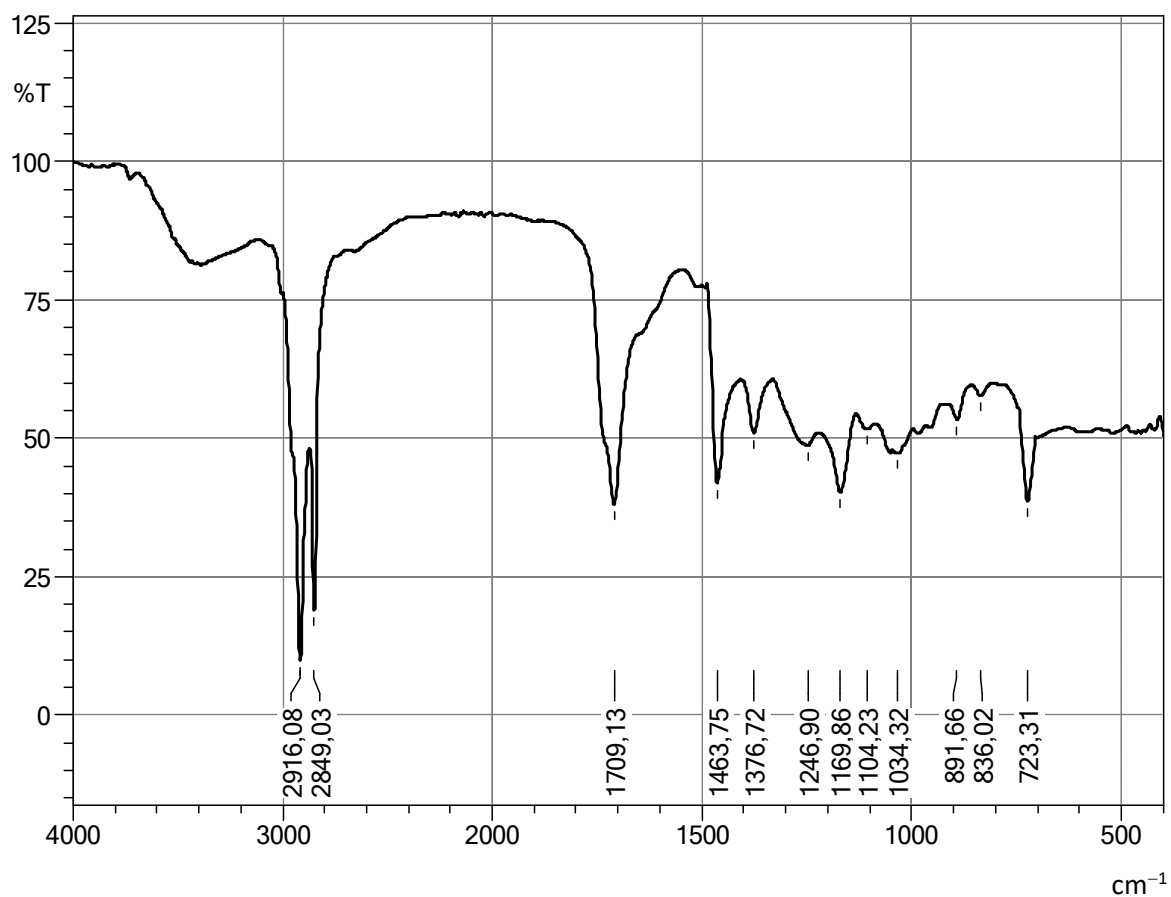

**Figure S13.** QATR-FTIR spectrum of the scCO<sub>2</sub> extract from *S. pectinata* harvested in June.

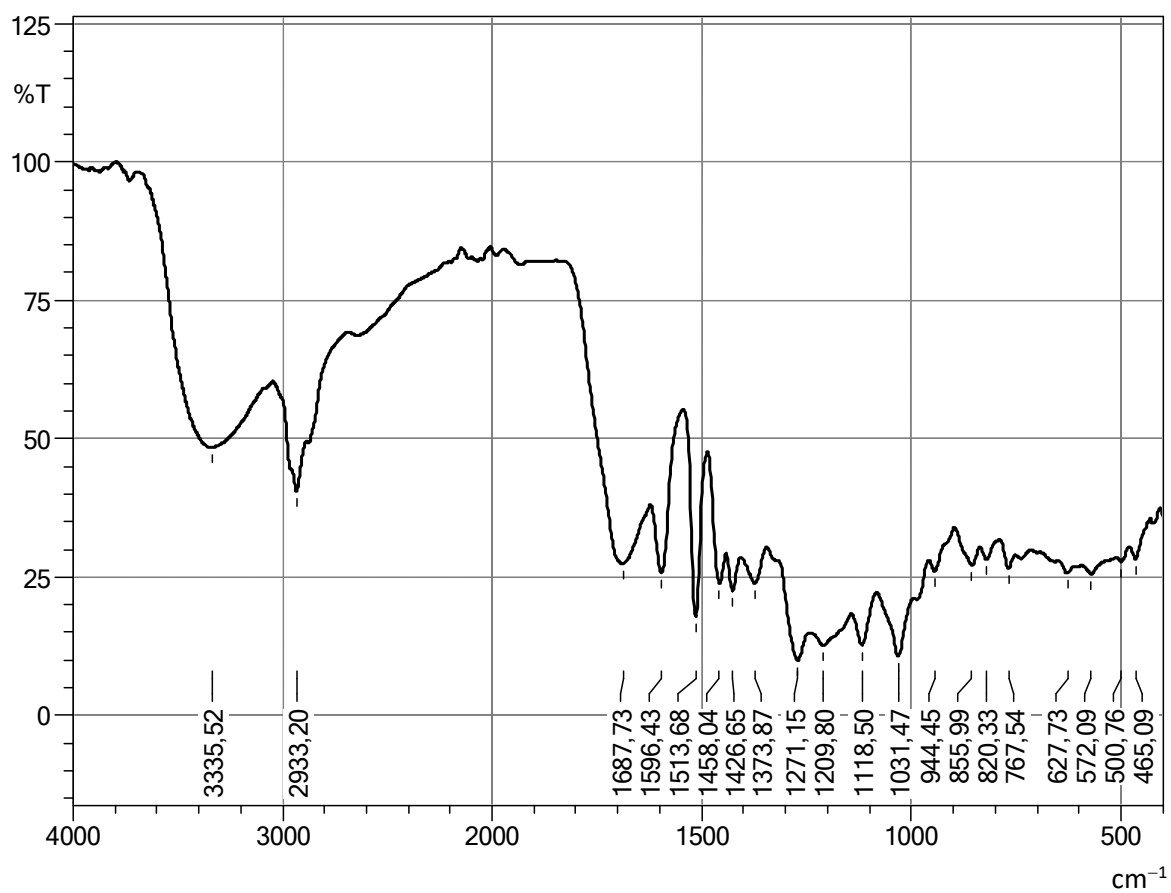

**Figure S14.** QATR-FTIR spectrum of the scCO<sub>2</sub>/H<sub>2</sub>O extract from *S. pectinata* harvested in June.
